# Supplementary material for: Exposure to Salinity and Light Spectra Regulates Glucosinolates, Phenolics, and Antioxidant Capacity of Brassica carinata L. Microgreens
Source: MDPI journal article supplement (doi:10.3390/antiox10081183), 2021-07-26
Supplement: s1 [file s1]

# Supplementary data:

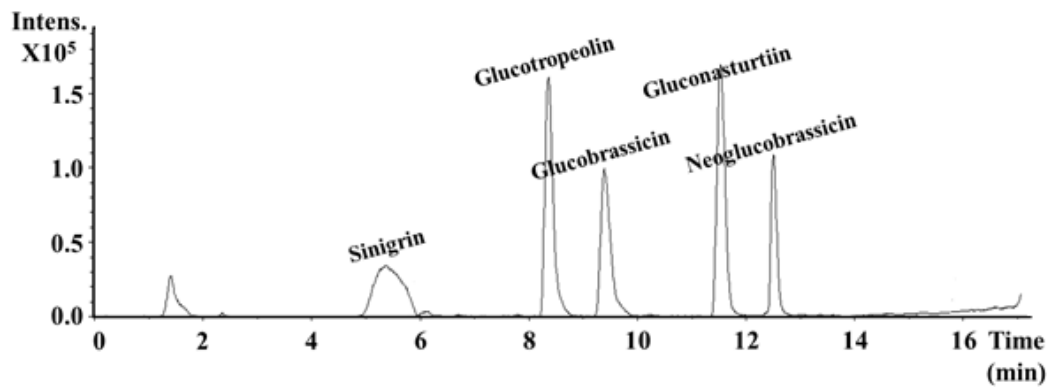

**Figure S1.** UPLC-DAD chromatogram of available standards detected at 229 nm.

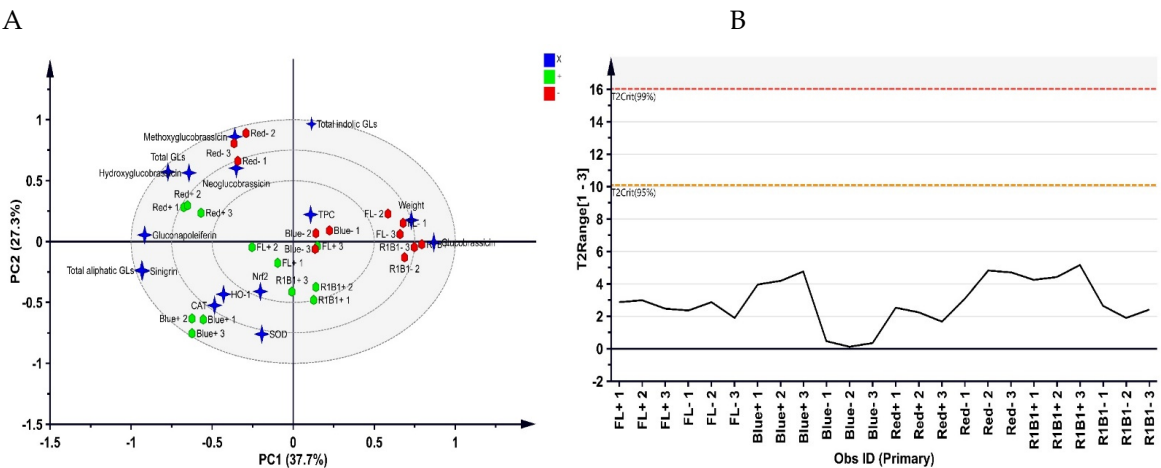

**Figure S2:** PCA bi-plot of *B.carinata* microgreens (A) showing separation of groups on the space. Green hexagons represent the group of microgreen samples under different lights that were treated to salt stress. Red hexagons: represent the group of microgreen samples that were not treated with salt. Blue stars: X-variable. (B) Hotelling's T2 range plots of the PCA belong to the normal area.

A

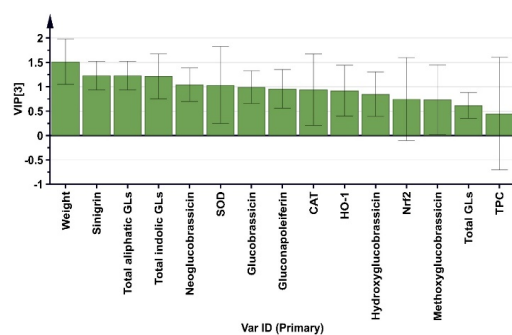

B

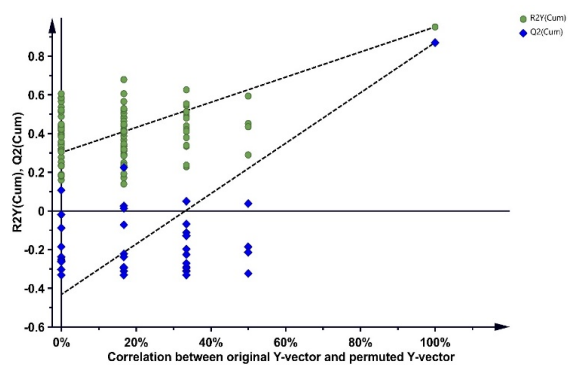

**Figure S3:** Multivariate statistical analysis done by SIMCA program of *B. carinata* microgreens. (A) The VIP score of the different variables. (B) showing a validation plot for OPLS-DA. Green circle: R2Y (Cum), Blue pentagons: Q2 (Cum).
